# Supplementary material
Source: PubMed Central journal article supplement (PMC9982745)

Supplementary Figure S1: Flow chart of cohort identification

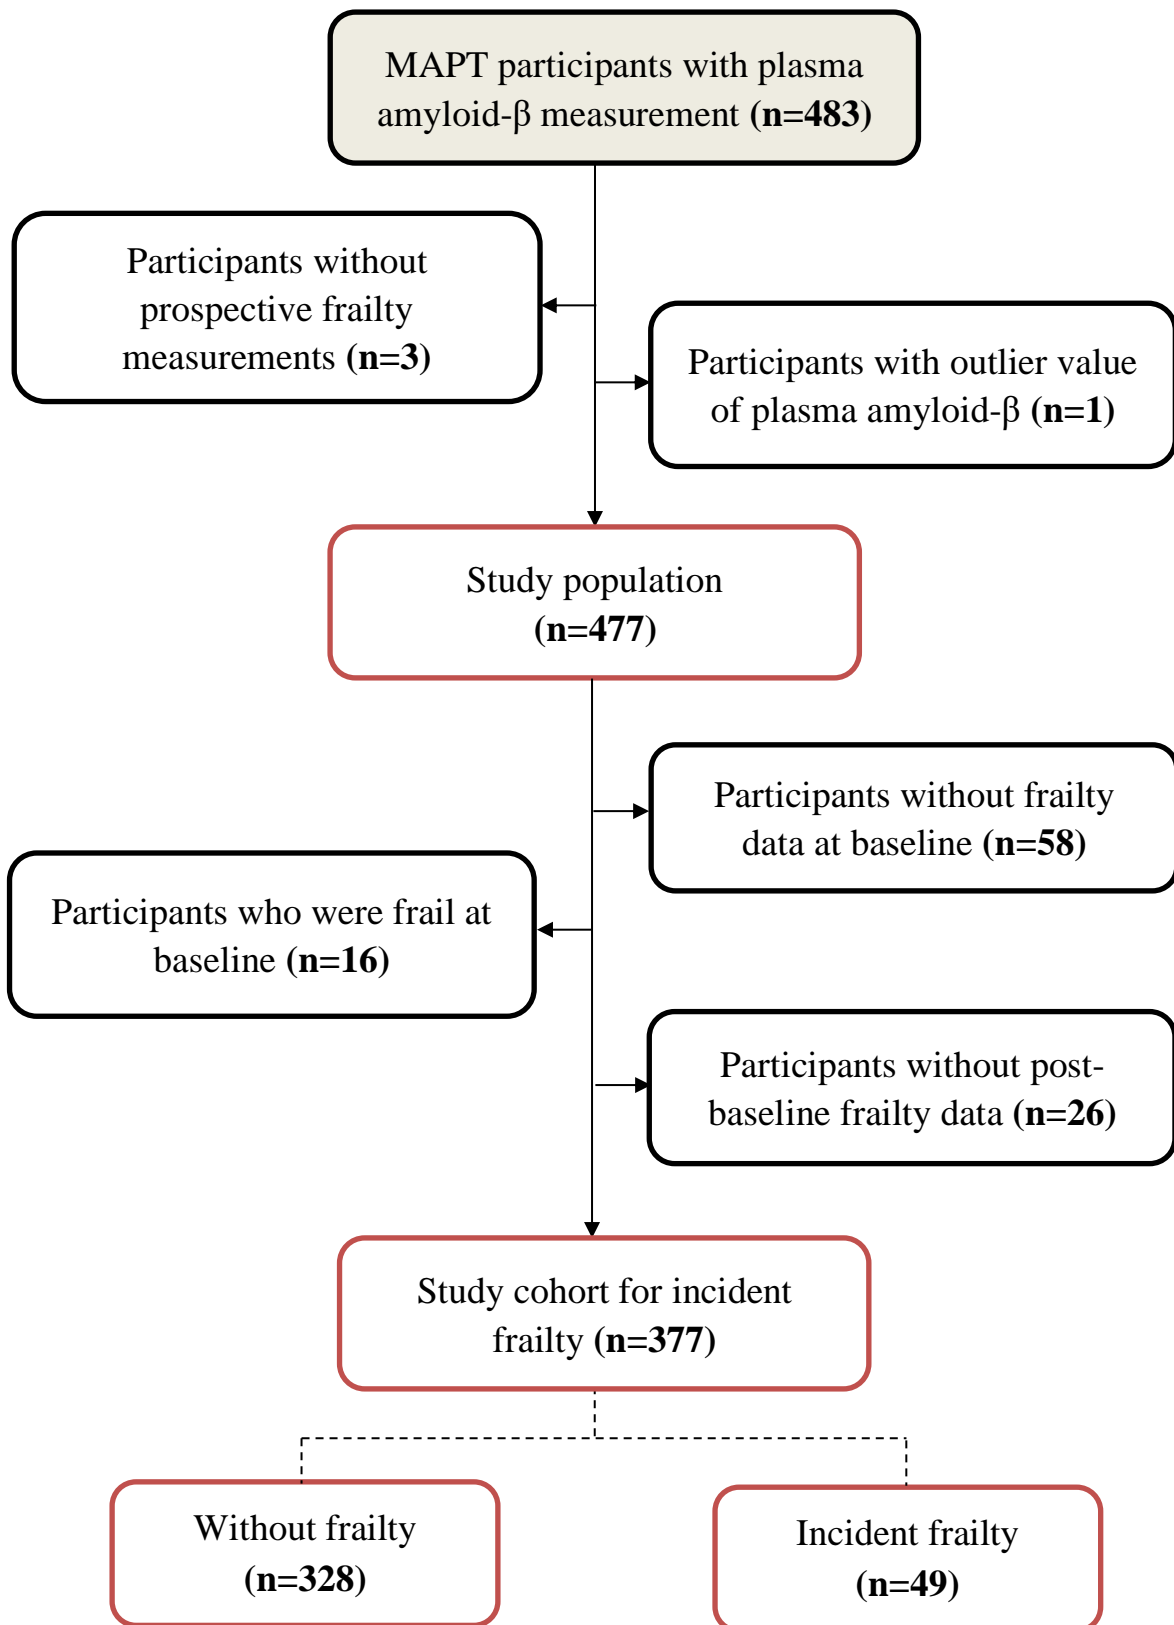

Supplement: NIHMS1847595-supplement-Lu_166_SF1.pdf [file NIHMS1847595-supplement-Lu_166_SF1.pdf]
